# Supplementary material
Source: Springer Nature journal article supplement (https://www.springermedizin.de/resource/supplementary/12901_2011_80_MOESM3_ESM.pdf/9515194)
Supplement: MOESM3 [file 9515194]

New patients entering  
the vertigo center:

Female: 854 (55.6%)  
Male: 681 (44.4%)  
Total: 1535 (100%)

Number of patients  
answering the letter of  
enquiry:

Female: 239 (28%)  
Male: 166 (24.4%)  
Total: 405 (26.4%)

Number of patients answering that  
they are not ready to participate:

Female: 62 (25.9%)  
Male: 39 (23.5%)  
Total: 101 (24.9%)

Number of patients answering that  
they would participate:

Female: 177 (74.1%)  
Male: 127 (76.5%)  
Total: 304 (75.1%)

Number of patients who did not  
fulfill the inclusion/ exclusion  
criteria and were excluded:

Female: 53 (29.9%)  
Male: 49 (38.6%)  
Total: 102 (33.6%)

Number of patients who fulfilled the  
inclusion/ exclusion criteria and were  
included in the survey:

Female: 124 (70.1%)  
Male: 78 (61.4%)  
Total: 202 (66.4%)
